# Supplementary material for: Four Aromatic Sulfates with an Inhibitory Effect against HCV NS3 Helicase from the Crinoid Alloeocomatella polycladia
Source: MDPI journal article supplement (doi:10.3390/md15040117), 2017-04-11
Supplement: s1 [file s1]

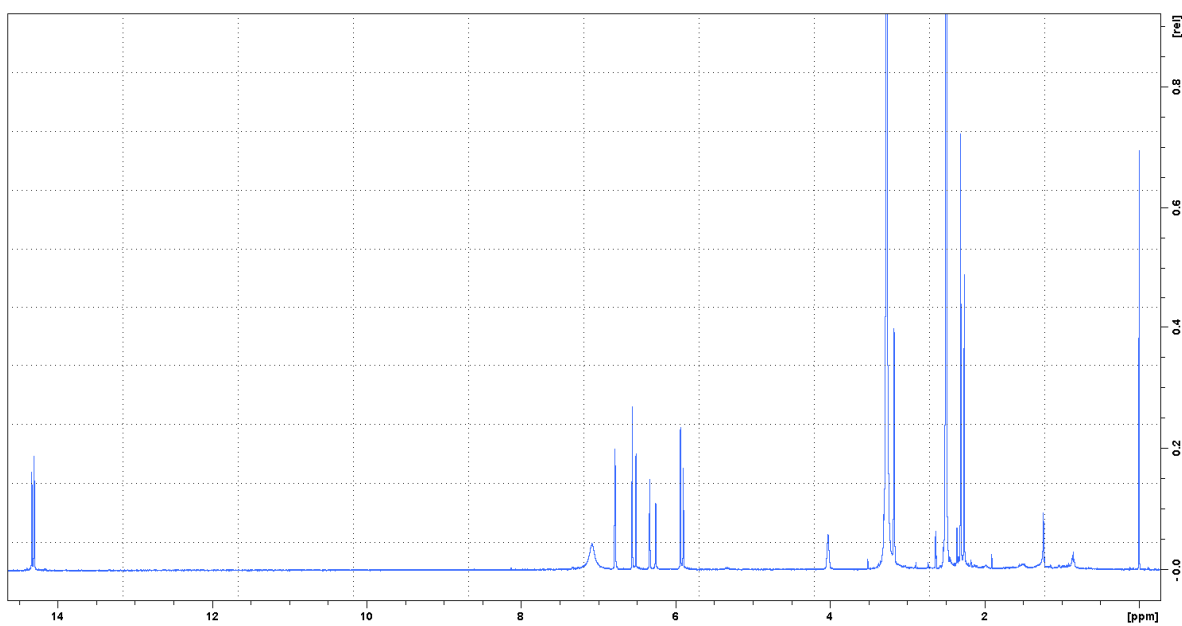

Figure 1.  $^1\text{H}$  NMR spectrum of compound **1** in  $\text{DMSO}-d_6$

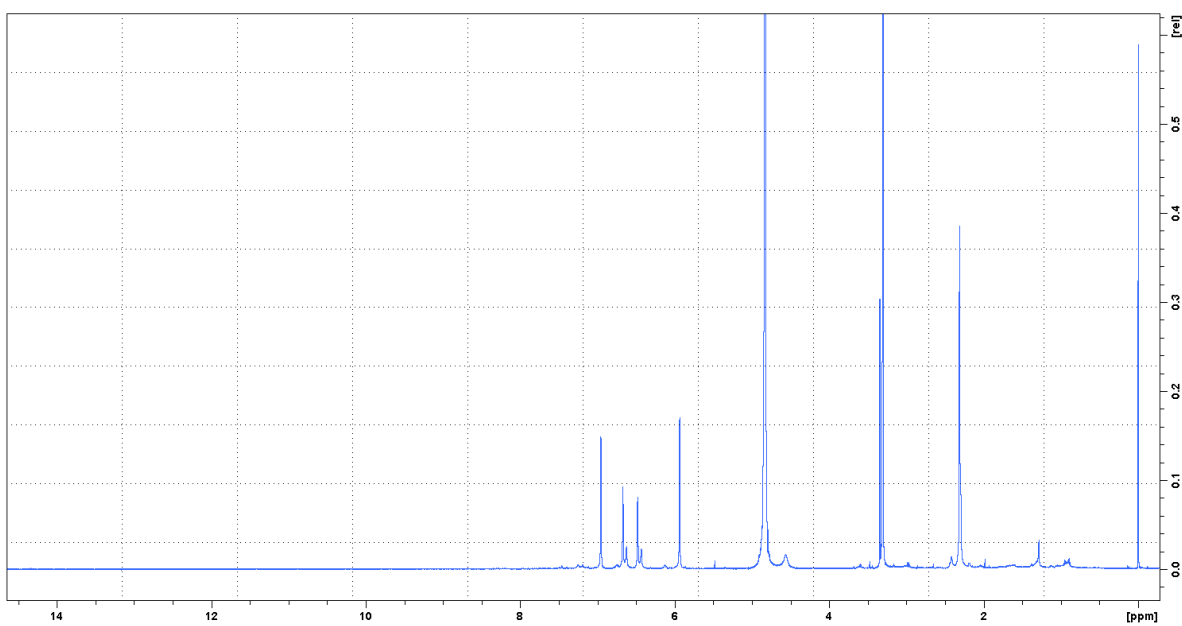

Figure 2.  $^1\text{H}$  NMR spectrum of compound **1** in  $\text{MeOH-}d_4$

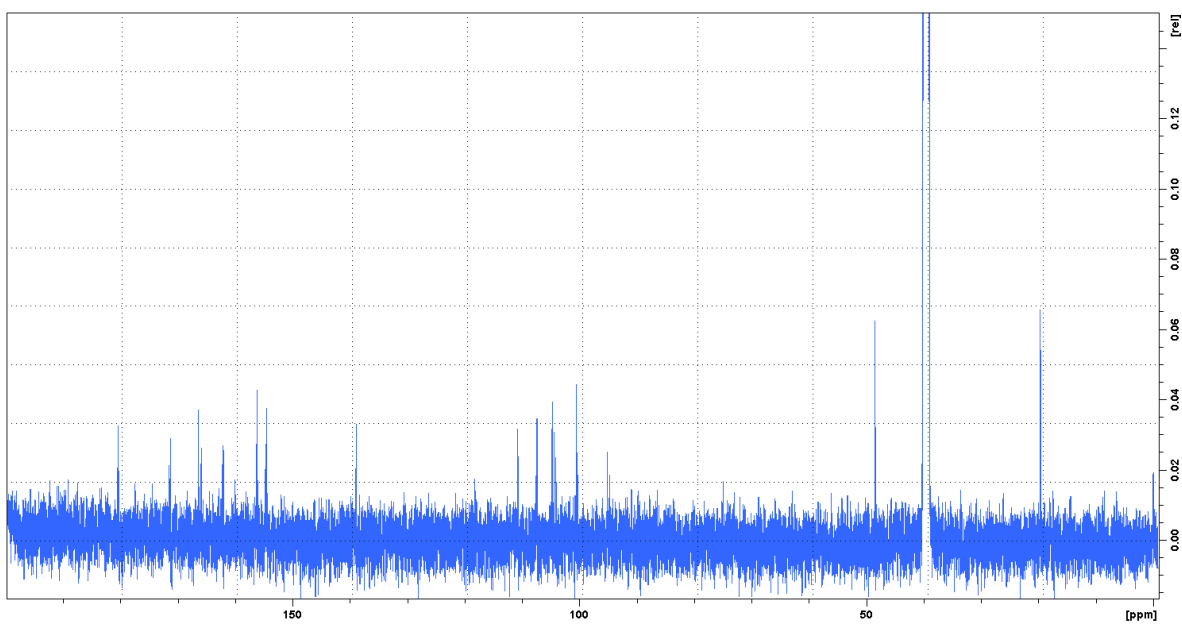

Figure 3.  $^{13}\text{C}$  NMR spectrum of compound **1** in  $\text{DMSO}-d_6$

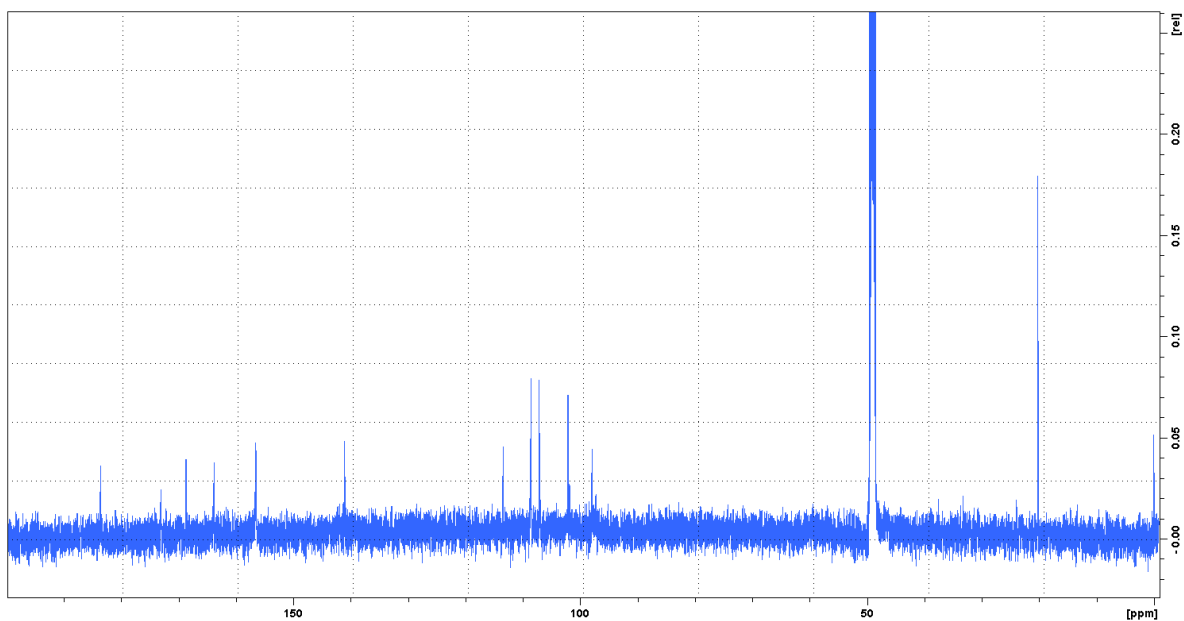

Figure 4.  $^{13}\text{C}$  NMR spectrum of compound **1** in  $\text{MeOH-}d_4$

測定データ名: IH D8-17-7 neg  
作成条件: Average(MS[1] Time:0.66..0.75)  
試料名(内部): IH D8-17-7 neg

実験日時: 2016/10/18 15:19:28  
イオン化モード: Dual ESI-

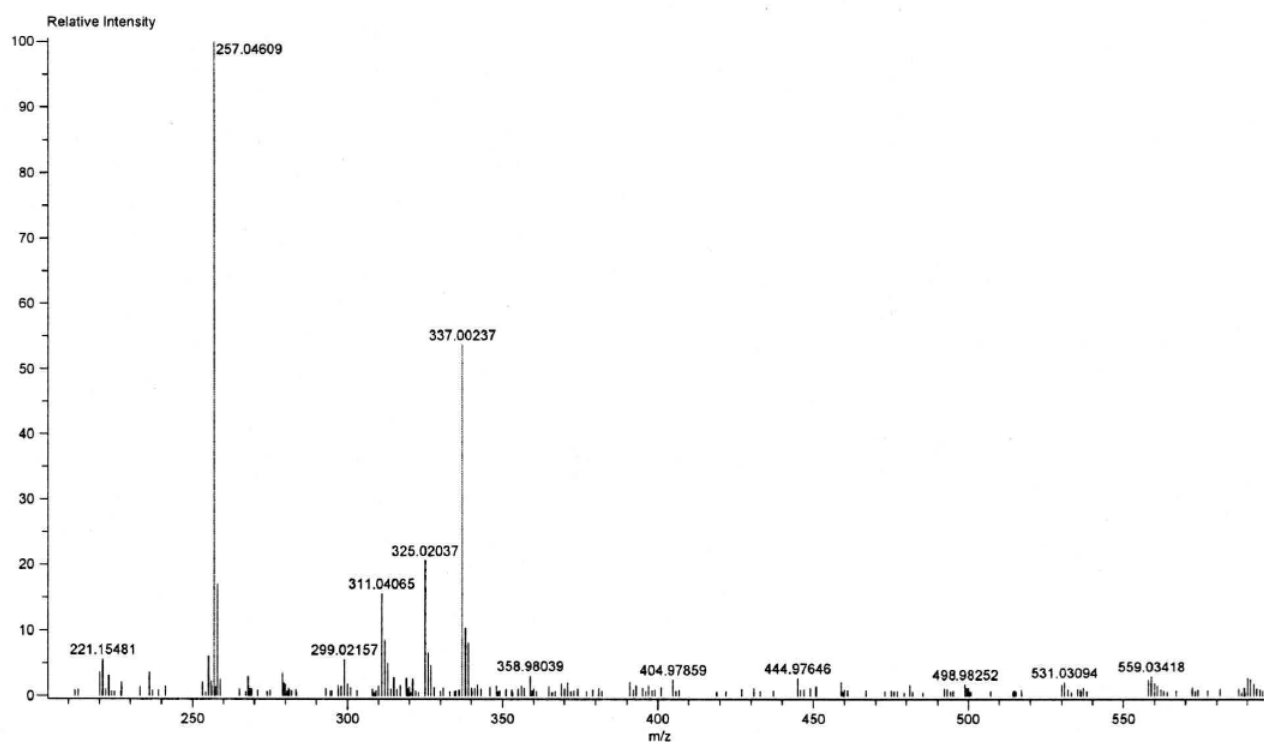

Figure 5. ESIMS of compound 1

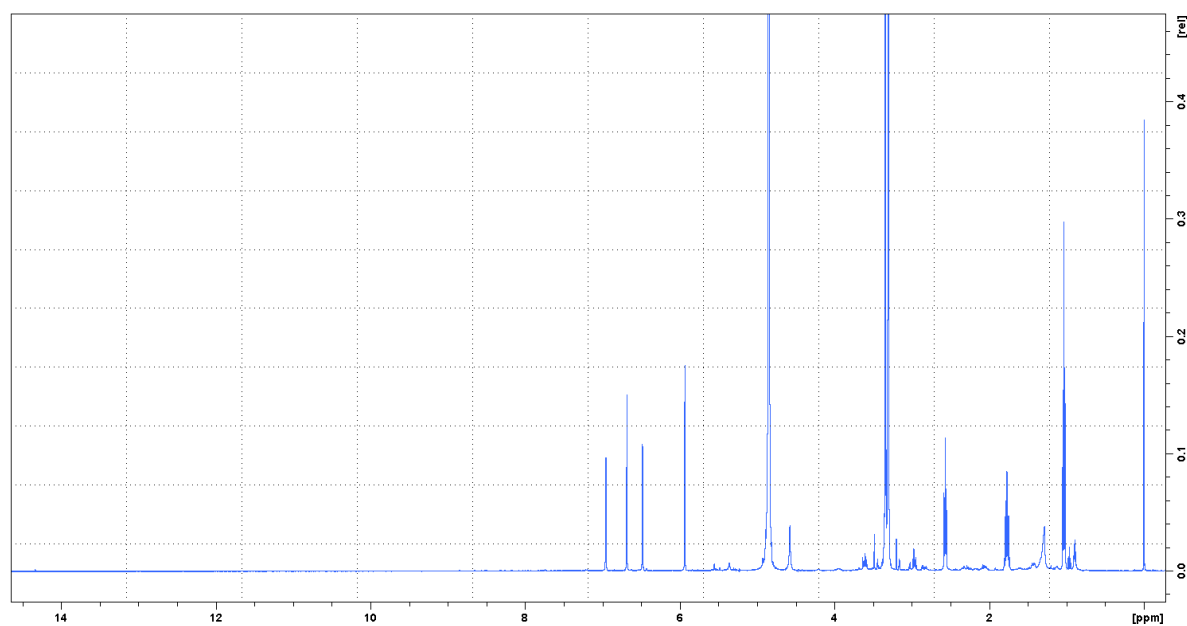

Figure 6.  $^1\text{H}$  NMR spectrum of compound **2** in  $\text{MeOH-}d_4$

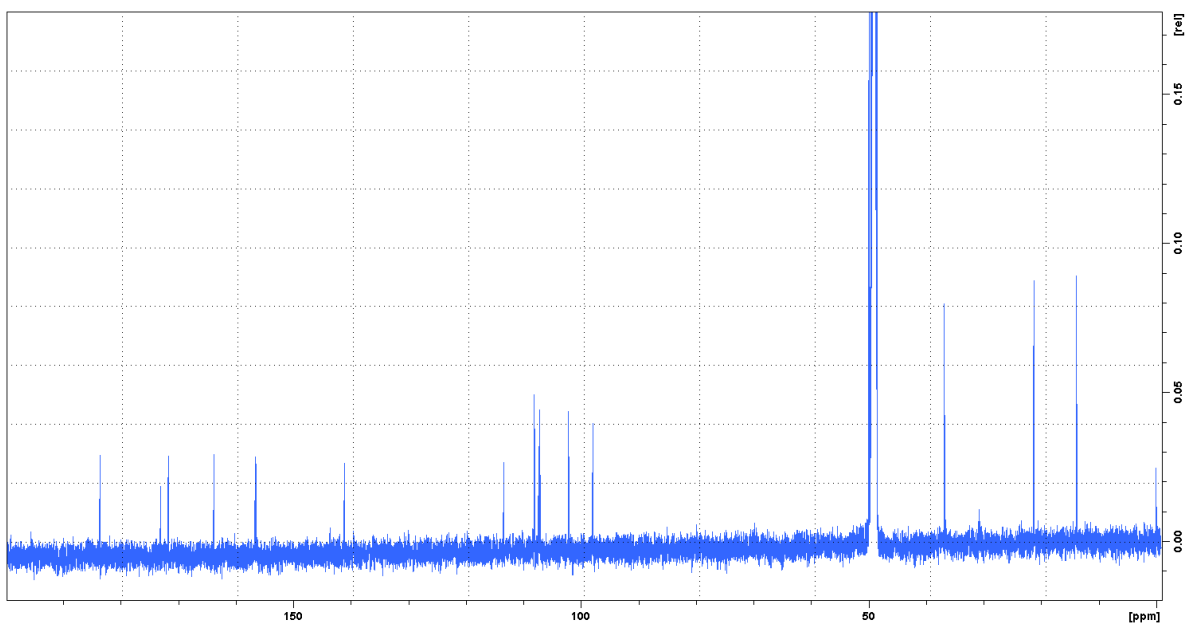

Figure 7.  $^{13}\text{C}$  NMR spectrum of compound **2** in  $\text{MeOH-}d_4$

測定データ名: NN-9-61-4 neg  
作成条件: 平均(MS[1] 経過時間: 0.60..0.62)

実験日時: 2010/11/18 14:40:26  
イオン化モード: デュアルESI-

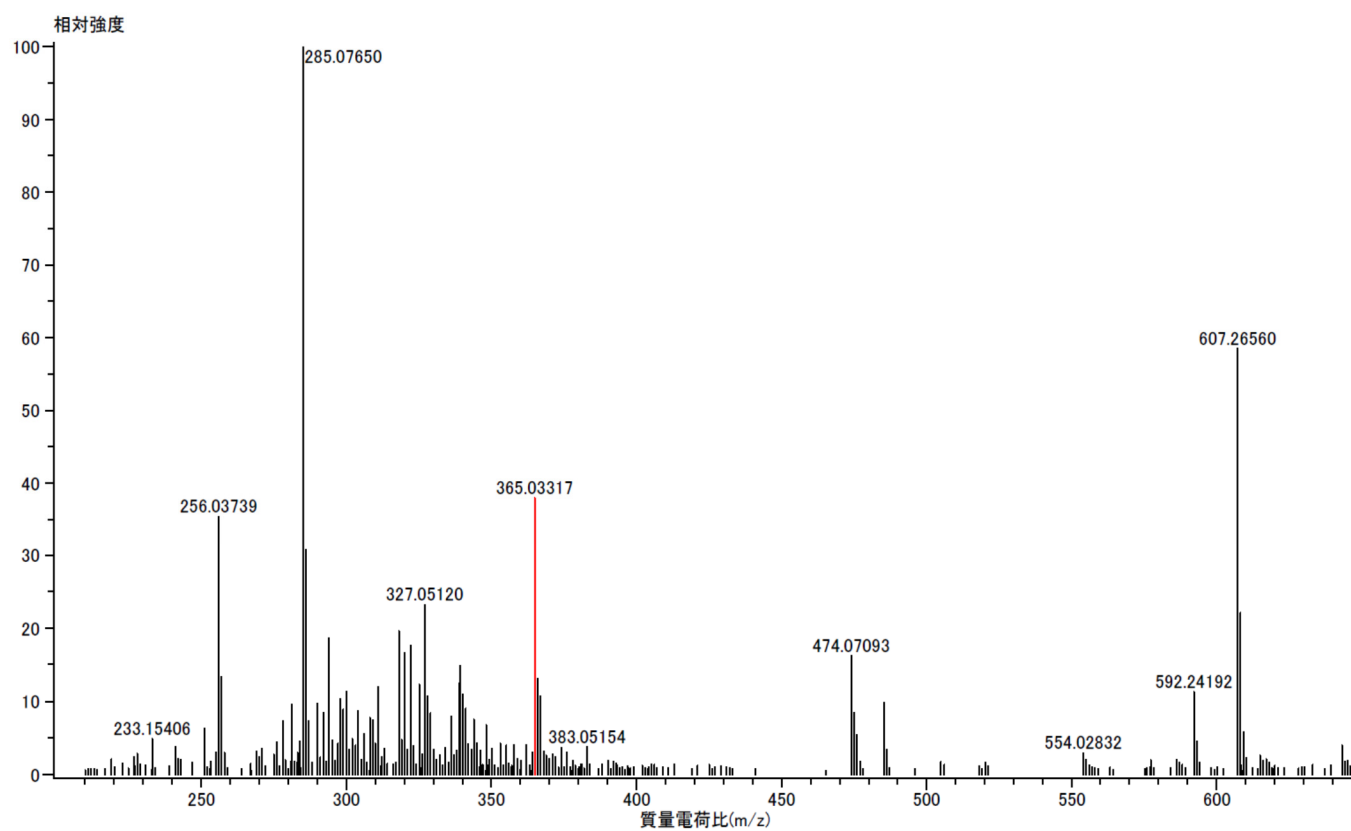

Figure 8. ESIMS of compound 2



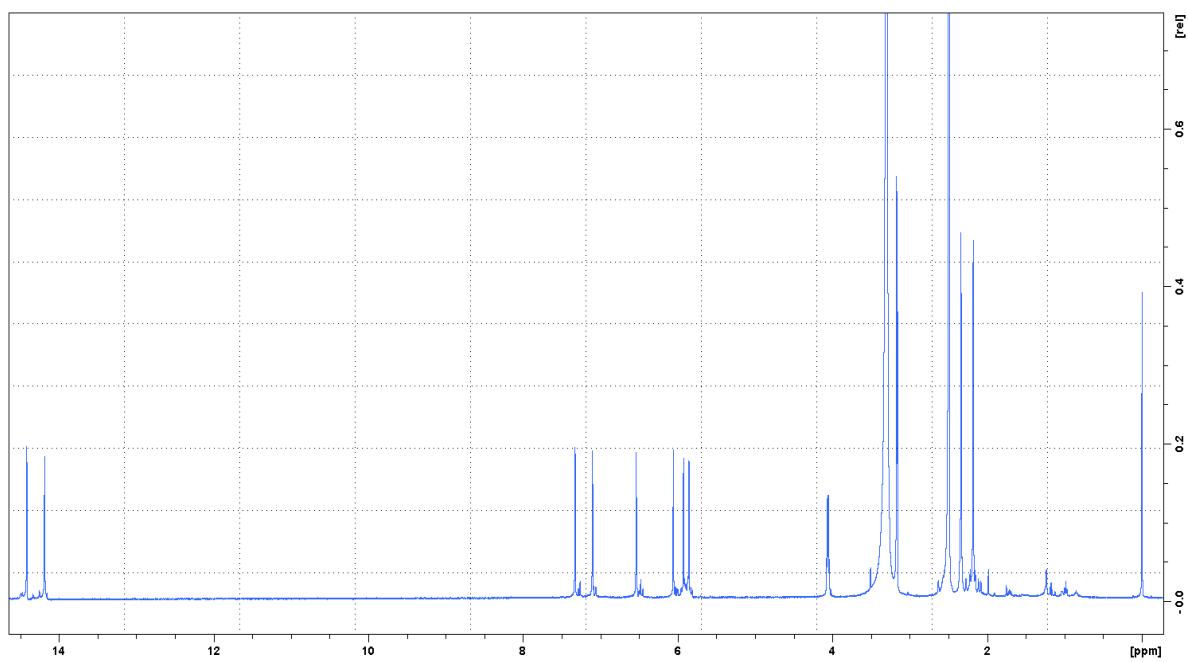

Figure 9.  $^1\text{H}$  NMR spectrum of compound **3** in  $\text{DMSO-}d_6$

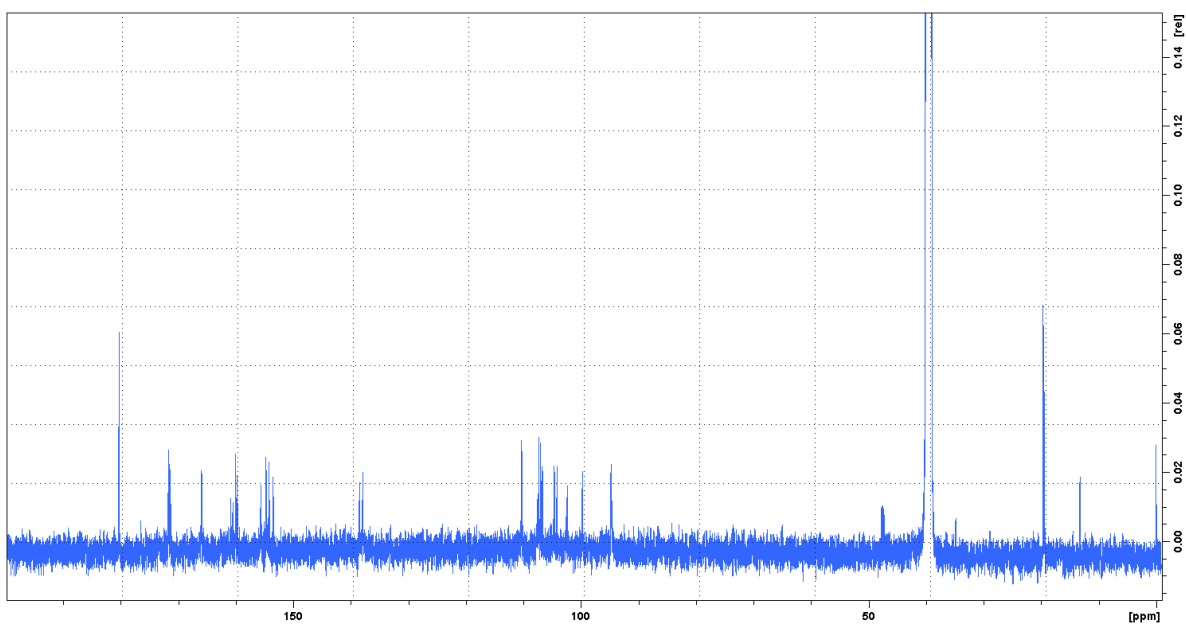

Figure 10.  $^{13}\text{C}$  NMR spectrum of compound **3** in  $\text{DMSO-}d_6$

測定データ名: IH D8-15-6 fix neg  
作成条件: Average(MS[1] Time:0.84..0.87)  
試料名(内部): IH D8-15-6 fix neg

実験日時: 2016/12/28 13:01:55  
イオン化モード: Dual ESI-

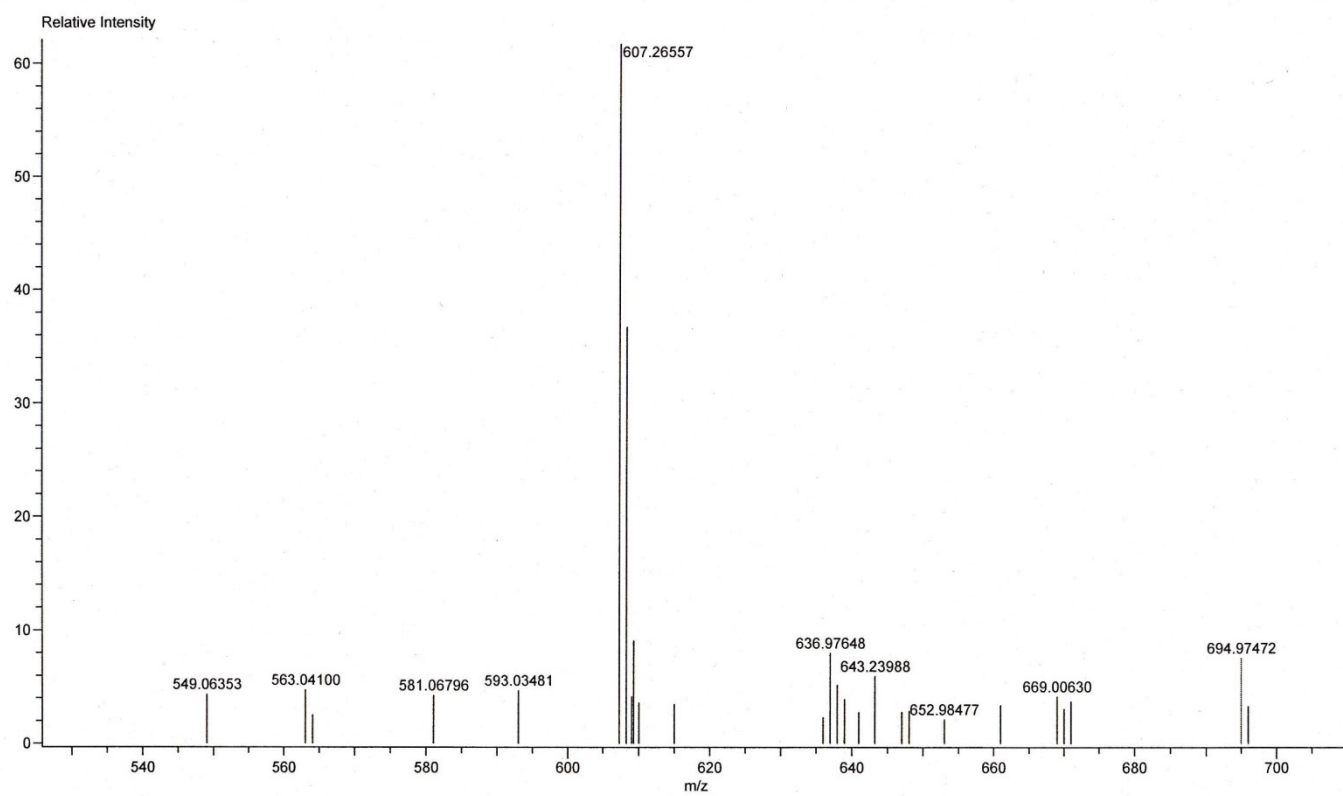

Figure 11. ESIMS of compound **3**

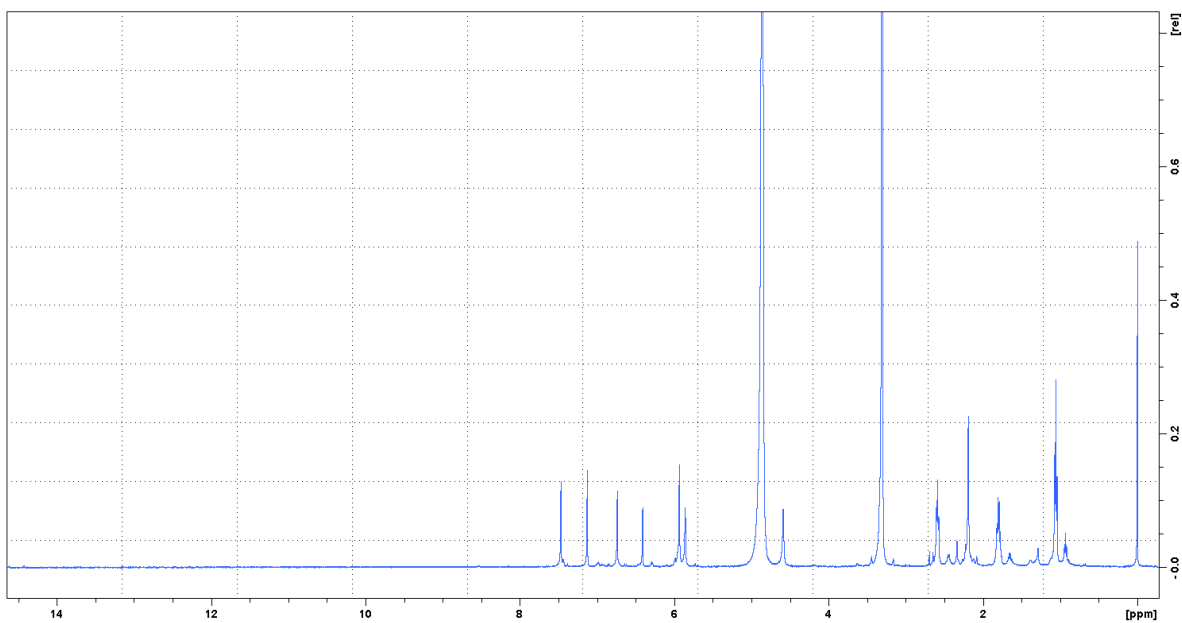

Figure 12.  $^1\text{H}$  NMR spectrum of compound **4** in  $\text{MeOH-}d_4$

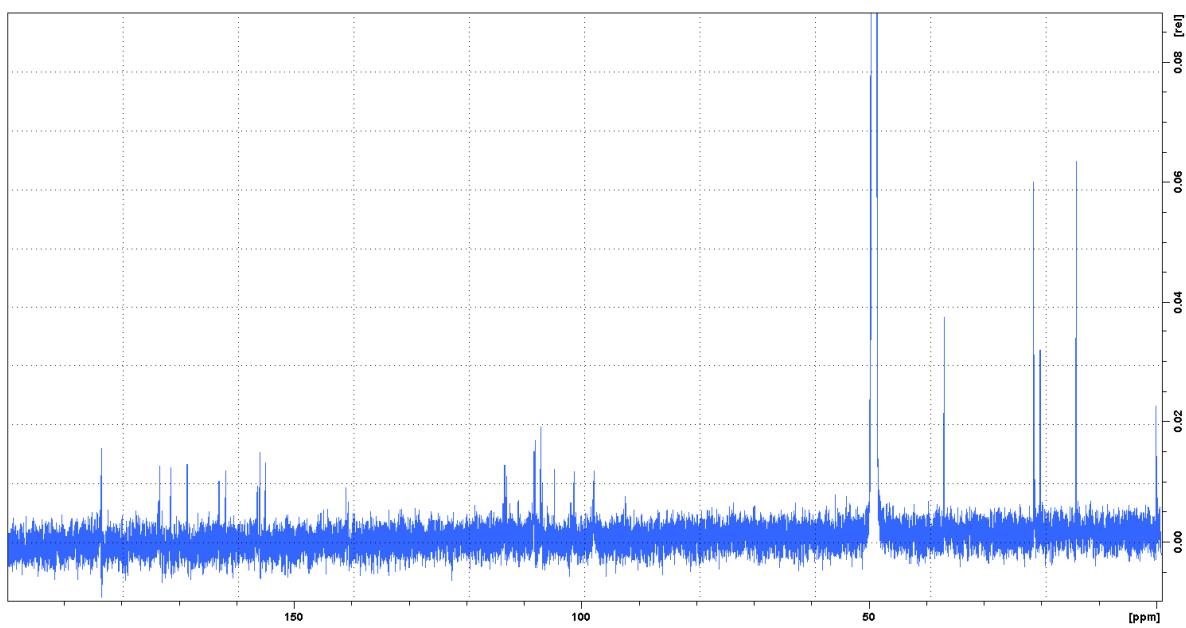

Figure 13.  $^{13}\text{C}$  NMR spectrum of compound **4** in  $\text{MeOH-}d_4$

測定データ名: IH D8-15-8 fix neg  
作成条件: Average(MS[1] Time:0.70..0.78)  
試料名(内部): IH D8-15-8 fix neg

実験日時: 2016/12/28 13:06:45  
イオン化モード: Dual ESI-

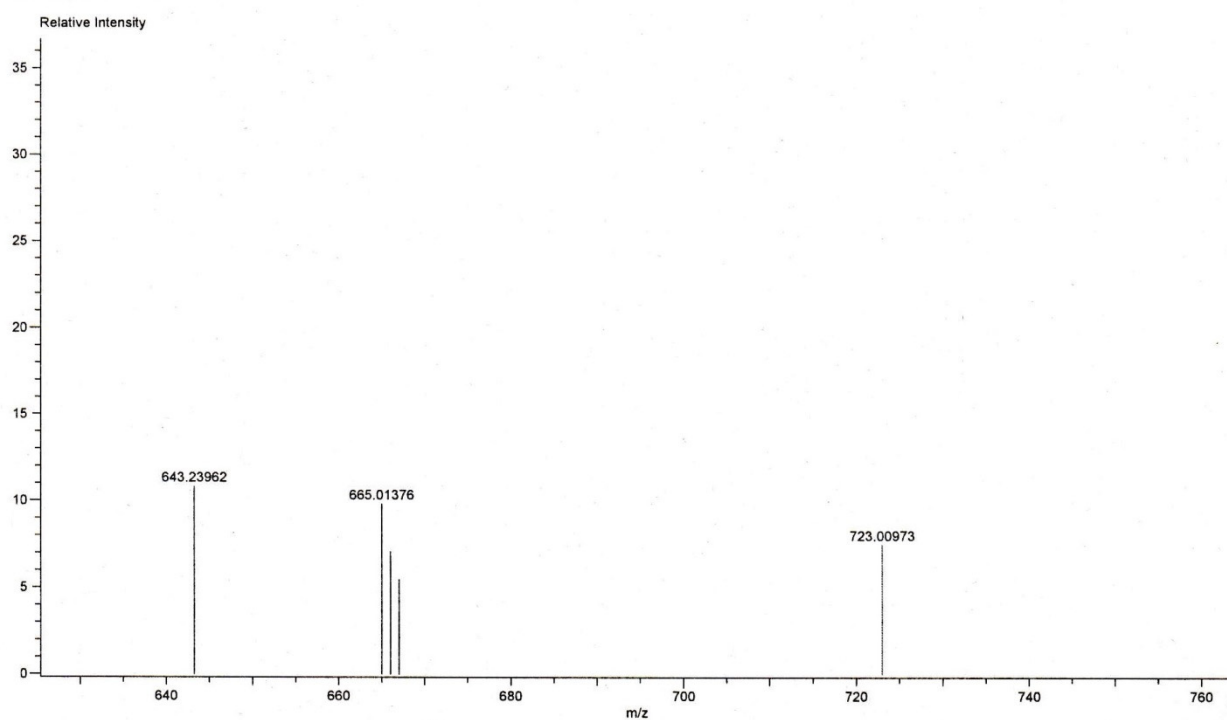

Figure 14. ESIMS of compound 4

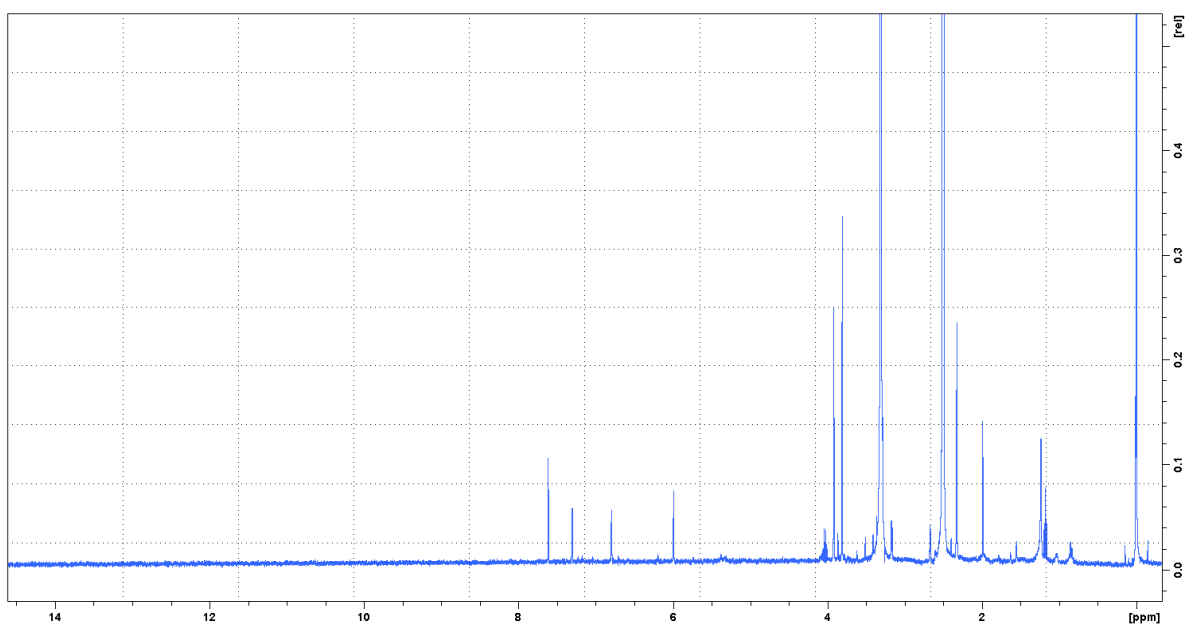

Figure 15.  $^1\text{H}$  NMR spectrum of compound **7** in  $\text{DMSO-}d_6$

測定データ名: IH D8-17-M7-2  
作成条件: Average(MS[1] Time:0.60\_0.87)  
試料名(内部): IH D8-17-M7-2

実験日時: 2016/12/01 16:31:06  
イオン化モード: Dual ESI-

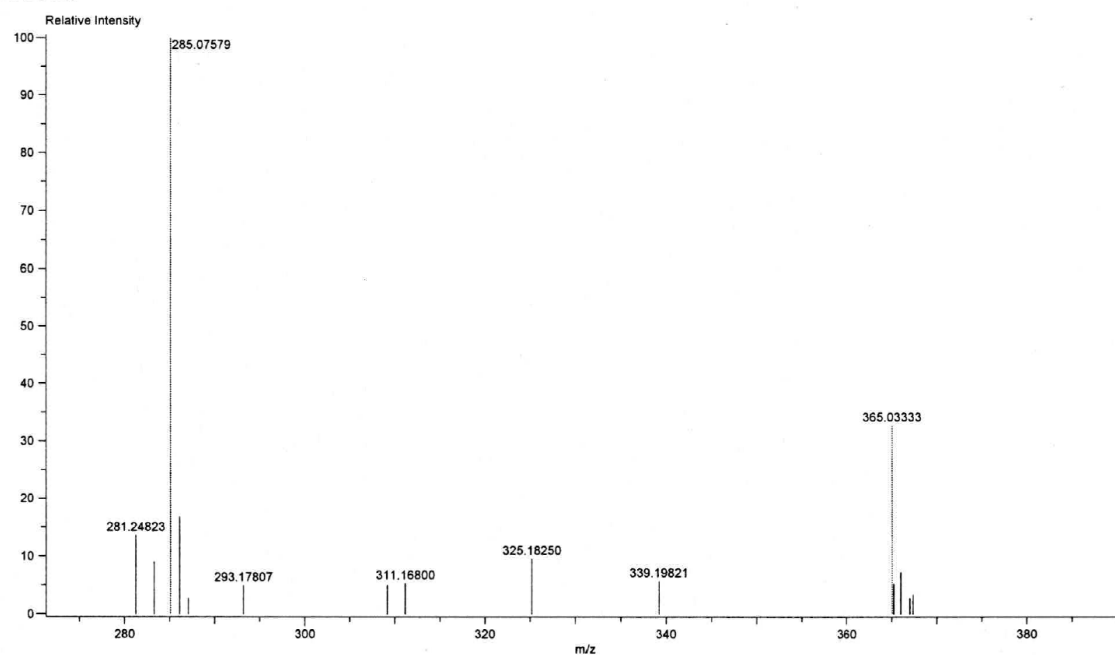

Figure 16. HRESIMS of compound 7
